# Supplementary material for: Ergothioneine suppresses hepatic stellate cell activation via promoting Foxa3-dependent potentiation of the Hint1/Smad7 cascade and improves CCl4-induced liver fibrosis in mice
Source: Royal Society of Chemistry journal article supplement (doi:10.1039/d3fo03643j), 2023-01-01
Supplement: d3fo03643j2.xlsx [file d3fo03643j2.xlsx]

## Sheet: Fig.1B
	Groups			Groups
Transwell	Vehicle	0.99002	Cell proliferation	Vehicle	0.90312
		0.93014			1.18333
		1.08014			0.91411
	TGFβ1	11.3215		TGFβ1	5.33142
		10.9996			4.88948
		12.2697			4.75105
	TGFβ1+EGT(5 μM)	6.76257		TGFβ1+EGT(5 μM)	2.56252
		6.45064			2.44035
		7.13796			2.41264
	TGFβ1+EGT(10 μM)	2.33953		TGFβ1+EGT(10 μM)	1.46733
		1.98175			1.55449
		1.56422			1.32179
	TGFβ1+Colchicine	1.12175		TGFβ1+Colchicine	1.68145
		2.24942			1.88633
		1.21342			1.70663
	TGFβ1+Sylibin	2.21142		TGFβ1+Sylibin	1.85067
		1.21733			1.77164
		1.76386			1.63078

## Sheet: Fig.1C
	Groups				Groups
collagenΙ/β-actin	Vehicle	0.823529		α-SMA/β-actin	Vehicle	0.883382
		1.22689				1.02332
		0.94958				1.09329
	TGFβ1	1.97612			TGFβ1	2.01331
		1.80154				2.14386
		2.09775				2.21403
	TGFβ1+EGT(5 μM)	2.09734			TGFβ1+EGT(5 μM)	1.57522
		2.09755				1.67595
		2.09743				1.60245
	TGFβ1+EGT(10 μM)	2.09735			TGFβ1+EGT(10 μM)	0.92262
		2.09732				1.0317
		2.09706				1.10914

## Sheet: Fig.1D
	Groups
CCK8	Vehicle	1.03722
		0.941704
		1.02108
	EGT(2 μM)	0.963677
		0.935775
		1.16895
	EGT(4 μM)	0.993722
		1.03146
		0.940807
	EGT(10 μM)	0.915695
		0.9713
		1.08744
	EGT(20 μM)	1.03722
		0.97547
		1.06395
	EGT(40 μM)	1.00493
		1.01458
		0.980717
	EGT(60 μM)	0.995067
		0.891031
		0.988789
	EGT(80 μM)	0.962332
		0.873991
		0.997758
	EGT(100 μM)	1.0426
		1.0133
		1.00448
