# Supplementary material for: Ergothioneine suppresses hepatic stellate cell activation via promoting Foxa3-dependent potentiation of the Hint1/Smad7 cascade and improves CCl4-induced liver fibrosis in mice
Source: Royal Society of Chemistry journal article supplement (doi:10.1039/d3fo03643j), 2023-01-01
Supplement: d3fo03643j3.xlsx [file d3fo03643j3.xlsx]

## Sheet: Fig.2A
Hint1/β-actin	Groups			Smad7/β-actin	Groups
	Vehicle	0.937063			Vehicle	0.850234
		0.93007				1.05761
		1.14685				1.09217
	TGFβ1	0.24589			TGFβ1	0.14283
		0.29245				0.21436
		0.17214				0.28321
	TGFβ1+EGT(5 μM)	0.70183			TGFβ1+EGT(5 μM)	0.37274
		0.738535				0.39564
		0.692942				0.363229
	TGFβ1+EGT(10 μM)	0.99145			TGFβ1+EGT(10 μM)	0.91747
		1.15246				0.93674
		0.963241				0.90547

## Sheet: Fig.2C
Hint1/GAPDH	Groups			Smad7/GAPDH	Groups
	Vehicle	1.02783			Vehicle	1.01414
		1.05718				1.04861
		0.915074				0.937251
	TGFβ1	0.292194			TGFβ1	0.16188
		0.243375				0.17374
		0.197882				0.192243
	TGFβ1+EGT(5 μM)	0.562529			TGFβ1+EGT(5 μM)	0.361734
		0.551862				0.48734
		0.475348				0.367547
	TGFβ1+EGT(10 μM)	0.80107			TGFβ1+EGT(10 μM)	0.688248
		1.06807				0.691256
		0.836113				0.521233

## Sheet: Fig.2D
Hint1/β-actin	Groups			Smad7/β-actin	Groups
	Vehicle	0.867138			Vehicle	1.03704
		1.01665				0.953704
		1.11632				1.00926
	EGT(5 μM)	1.82212			EGT(5 μM)	1.45145
		1.9942				1.41675
		2.03254				1.5986
	EGT(10 μM)	2.30175			EGT(10 μM)	1.68424
		2.10586				1.75724
		2.47446				2.05286

## Sheet: Fig.2E
Hint1/GAPDH	Groups			Smad7/GAPDH	Groups
	Vehicle	1.00912			Vehicle	1.17812
		1.09335				0.88823
		0.89933				1.00122
	EGT(5 μM)	1.73924			EGT(5 μM)	1.43312
		2.24412				1.76323
		2.36979				1.59864
	EGT(10 μM)	3.95306			EGT(10 μM)	3.52923
		4.13515				3.18532
		4.22614				3.22729
