# Supplementary material for: Ergothioneine suppresses hepatic stellate cell activation via promoting Foxa3-dependent potentiation of the Hint1/Smad7 cascade and improves CCl4-induced liver fibrosis in mice
Source: Royal Society of Chemistry journal article supplement (doi:10.1039/d3fo03643j), 2023-01-01
Supplement: d3fo03643j4.xlsx [file d3fo03643j4.xlsx]

## Sheet: Fig.3C
Smad7/β-actin	Groups			Smad7/β-actin	Groups
	Vector	0.908112			Vehicle	0.98682
		0.968653				1.0727
		1.12337				0.941327
	Flag-Hint1	3.14212			TGFβ1	0.16188
		3.43842				0.17374
		3.29723				0.192243
