# Supplementary material for: Ergothioneine suppresses hepatic stellate cell activation via promoting Foxa3-dependent potentiation of the Hint1/Smad7 cascade and improves CCl4-induced liver fibrosis in mice
Source: Royal Society of Chemistry journal article supplement (doi:10.1039/d3fo03643j), 2023-01-01
Supplement: d3fo03643j5.xlsx [file d3fo03643j5.xlsx]

## Sheet: Fig.4B
	Groups			Groups
Foxa3/β-actin	Vehicle	1.02128	Hint1/β-actin	Vehicle	0.866197
		0.893617			1.02113
		1.08511			1.11268
	Si-con	1.1423		Si-con	0.88659
		1.09786			1.12504
		0.9944			0.89167
	Si-Hint1	1.2076		Si-Hint1	0.88977
		0.87404			1.12528
		1.14585			0.89115

## Sheet: Fig.4C
	Groups			Groups
Foxa3/β-actin	Vehicle	0.99322	Hint1/β-actin	Vehicle	0.94231
		0.97214			1.04461
		1.03612			1.01556
	Si-con	0.97412		Si-con	0.92622
		1.10364			1.19975
		1.19624			1.0335
	Si-Foxa3	0.41279		Si-Foxa3	0.28345
		0.30146			0.14978
		0.29559			0.34309

## Sheet: Fig.4D
	Groups			Groups
Hint1/GAPDH	Vehicle	0.96251	Hint1/GAPDH	Vehicle	0.742686
		1.10723			1.11268
		0.94002			1.14483
	Si-con	0.94665		Vector	1.01524
		0.99734			1.03013
		1.02349			0.764625
	Si-Foxa3	0.23173		Flag-Foxa3	4.16647
		0.23224			3.36318
		0.26673			3.88476

## Sheet: Fig.4E
	Groups
Luciferase activity	WT△-Hint1	1.16621
		1.01811
		0.880312
	WT△-Hint1+Vector (0.50 μg)	1.13623
		1.1652
		0.7698
	WT△-Hint1+Flag-foxa3(0.25 μg)	2.2653
		2.9383
		2.4477
	WT△-Hint1+Flag-foxa3(0.50 μg)	8.30772
		7.12444
		7.55384
	△-hFBS1 P-Hint1+Flag-foxa3(0.50 μg)	7.46644
		7.32442
		7.24243
	△-hFBS2 P-Hint1+Flag-foxa3(0.50 μg)	3.45324
		4.02442
		3.34244

## Sheet: Fig.4F
	Groups
Luciferase activity	WT△-Hint1	0.82435
		1.12434
		1.0546
	WT△-Hint1+EGT (5 μM)	4.24535
		3.92453
		3.45754
	WT△-Hint1+EGT (10 μM)	6.3525
		6.0243
		7.6462
	△-hFBS1 P-Hint1+EGT(10 μM)	5.9352
		7.0244
		6.8355
	△-hFBS2 P-Hint1+EGT(10 μM)	1.1234
		1.42335
		1.2657

## Sheet: Fig.4G
	Groups
Luciferase activity	WT△-Hint1+Si-Con	1.16224
		1.04553
		0.79532
	WT△-Hint1+Si-Con+EGT (10 μM)	7.72423
		7.12424
		7.93565
	WT△-Hint1+Si-Foxa3+EGT (10 μM)	7.72483
		7.12494
		7.93585

## Sheet: Fig.4I
	Groups			Groups
Foxa3/β-actin	Vehicle	1.06607	Foxa3/Lamin B1	Vehicle	0.92841
		1.01351			1.08816
		0.923423			0.99212
	EGT (5 μM)	1.01124		EGT (5 μM)	1.42213
		0.84757			1.3134
		0.91256			1.43265
	EGT (10 μM)	1.0575		EGT (10 μM)	1.50155
		0.9195			1.80599
		1.03575			1.67456
