# Supplementary material for: Ergothioneine suppresses hepatic stellate cell activation via promoting Foxa3-dependent potentiation of the Hint1/Smad7 cascade and improves CCl4-induced liver fibrosis in mice
Source: Royal Society of Chemistry journal article supplement (doi:10.1039/d3fo03643j), 2023-01-01
Supplement: d3fo03643j6.xlsx [file d3fo03643j6.xlsx]

## Sheet: Fig.5C
Collgen I/β-actin	Groups		α-SMA/β-actin	Groups
	Vector	1.0021		Vector	0.955434
		0.925018			1.00475
		1.07218			1.04173
	Vector+TGFβ1	2.01822		Vector+TGFβ1	2.41632
		2.08129			2.50262
		2.19341			2.45331
	Flag-Foxa3	1.06517		Flag-Foxa3	0.918449
		0.932025			0.924613
		1.02313			0.973926
	Flag-Foxa3+TGFβ1	1.00911		Flag-Foxa3+TGFβ1	1.0479
		0.953048			1.05406
		1.16328			0.973926
