# Supplementary material for: Ergothioneine suppresses hepatic stellate cell activation via promoting Foxa3-dependent potentiation of the Hint1/Smad7 cascade and improves CCl4-induced liver fibrosis in mice
Source: Royal Society of Chemistry journal article supplement (doi:10.1039/d3fo03643j), 2023-01-01
Supplement: d3fo03643j7.xlsx [file d3fo03643j7.xlsx]

## Sheet: Fig.6B
	Groups
desmin/GAPDH	Primary HCs	0.95291
		1.06619
		0.981786
	Primary HSCs	5.59899
		4.03341
		5.58349

## Sheet: Fig.6C
	Groups
CCK8	Vehicle	0.882481
		1.0457
		1.07182
	EGT(10 μM)	0.983678
		1.037
		0.973885
	EGT(30 μM)	0.940152
		1.64244
		0.943417
	EGT(100 μM)	1.00871
		0.983678
		0.998912
