# Supplementary material for: Ergothioneine suppresses hepatic stellate cell activation via promoting Foxa3-dependent potentiation of the Hint1/Smad7 cascade and improves CCl4-induced liver fibrosis in mice
Source: Royal Society of Chemistry journal article supplement (doi:10.1039/d3fo03643j), 2023-01-01
Supplement: d3fo03643j8.xlsx [file d3fo03643j8.xlsx]

## Sheet: Table1
	Groups			Groups			Groups			Groups
Liver index	Control	3.42	ALT	Control	54.42	AST	Control	64.49	ALP	Control	20.78
		3.63			79.61			56.1			15.27
		3.82			52.46			68			16.17
		3.79			57.62			46.06			22.32
		3.66			75.07			35.73			24.79
		2.91			53.18			62.38			22.56
		3.77			53.95			81.98			16.48
		4.24			57.29			33.67			17.71
	CCl4	6.34		CCl4	247.44		CCl4	249.42		CCl4	39.59
		5.74			340.24			222.23			35.51
		5.99			256.59			207.55			53.38
		3.94			260.52			212.62			35.78
		5.16			280.83			256.69			47.54
		4.98			313.81			262.83			47.48
		5.62			270.57			246.22			37.03
		6.12			282			198.03			36.69
	CCl4+EGT(5 mg/kg)	3.59		CCl4+EGT(5 mg/kg)	190.85		CCl4+EGT(5 mg/kg)	146.43		CCl4+EGT(5 mg/kg)	36.34
		4.19			166.5			124.09			33.9
		4.72			184.75			127.75			31.85
		4.66			153.7			129.43			15.99
		4.28			166.5			143.28			38.63
		2.17			178.96			126.88			30.59
		4.6			179.78			122.4			20.5
		5.91			111.35			137.74			18.16
	CCl4+EGT(15 mg/kg)	4.54		CCl4+EGT(15 mg/kg)	95.78		CCl4+EGT(15 mg/kg)	103.57		CCl4+EGT(15 mg/kg)	9.39
		4.07			92.95			99.3			23.13
		4.3			63.25			98.51			18.38
		2.12			104.3			69.98			28.69
		3.46			101.84			96.74			34.02
		3.35			80.3			75.33			27.96
		3.93			72.61			63.14			7.08
		4.36			96.58			95.43			16.24
	CCl4 + Silybin (100 mg/kg)	3.39		CCl4 + Silybin (100 mg/kg)	76.91		CCl4 + Silybin (100 mg/kg)	57.3		CCl4 + Silybin (100 mg/kg)	13.25
		3.78			58.2			56.98			19.25
		3.49			94.89			92.06			19.23
		3.25			63.36			82.14			7.18
		3.67			51.39			61.48			25.62
		4.25			76.18			61.33			7.59
		4.17			103.13			58.35			20.61
		3.63			78.73			80.36			26.68
Group	Liver index (%)	ALT (U/L)	AST (U/L)	ALP (U/L)
Normal	3.66 ± 0.38	60.4 ± 10. 7	56.1 ± 16.6	19.5 ± 3.6
CCl4	5.49 ± 0.78 ##	282.0 ± 31.2 ##	231.9 ± 24.8 ##	41.6 ± 6. 9 ##
CCl4 + EGT (5 mg/kg)	4.27 ± 1.07 *	166.5 ± 25.2 **	132.2 ± 9.1 **	28.2 ± 8.7 **
CCl4 + EGT (15 mg/kg)	3.77 ± 0.79 **	88.5 ± 14.8 **	87.7 ± 15.7 **	20.6 ± 9.6 **
CCl4 + Silybin (100 mg/kg)	3.70 ± 0.35 **	75.3 ± 17.6 **	68.8 ± 13.9 **	17.4 ± 7.5 **

## Sheet: Table2
	Groups			Groups			Groups
HYP	Control	75.6	HA	Control	33.98	PCⅢ	Control	103.54
		73.77			36.1			109.33
		68.58			33.28			86.53
		47.73			37.14			113.42
		51.96			47.53			99.85
		66.59			57.39			86.64
		73.61			38.88			100.4
		59.23			48.61			103.09
	CCl4	105.85		CCl4	157.91		CCl4	221.52
		65.75			238.34			224.89
		103.01			211.95			234.1
		134.15			217.63			259.78
		103.01			167.82			237.56
		113.77			181.15			278.33
		119.27			211.27			255.59
		79.24			181.29			258.08
	CCl4+EGT(5 mg/kg)	83.93		CCl4+EGT(5 mg/kg)	110.4		CCl4+EGT(5 mg/kg)	135
		79.94			111.91			177.05
		79.24			76.67			154.87
		72.2			126.67			176.04
		108.78			100.21			169.82
		90.7			121.97			163.24
		62.5			100.41			143.24
		94.09			121.7			149.64
	CCl4+EGT(15 mg/kg)	56.58		CCl4+EGT(15 mg/kg)	43.34		CCl4+EGT(15 mg/kg)	128.79
		59.7			39.23			123.83
		58.43			61.74			89.49
		72.34			56.55			85.53
		85.62			62.37			90.85
		52.24			65.43			117.46
		72.29			59.32			89.99
		85.99			36.76			117.46
	CCl4 + Silybin (100 mg/kg)	51.94		CCl4 + Silybin (100 mg/kg)	67.41		CCl4 + Silybin (100 mg/kg)	106.2
		58.75			49.7			127.21
		80.56			56.98			120.39
		63.59			63.37			109.39
		64.9			37.9			102.82
		59.35			24.2			121.1
		54.07			37.19			101.46
		65.51			41.93			114.1
Group	HA (μg/L)	PC III (μg/L)	HYP (μg/mL)
Normal	64.6 ± 10.6	41.6 ± 8.6	100.4 ± 9.6
CCl4	103.0 ± 21.7 ##	195.9 ± 27.9 ##	246.2 ± 19.7 ##
CCl4 + EGT (5 mg/kg)	83.9 ± 14.1 **	108.7 ± 16.2 **	158.6 ± 15.5 **
CCl4 + EGT (15 mg/kg)	67.9 ± 13.2 **	53.1 ± 11.5 **	105.4 ± 18.0 **
CCl4 + Silybin (100 mg/kg)	62.3 ± 8.9 **	47.3 ± 14.7 **	112.8 ± 9.4 **
