# Supplementary figures and images for: Ergothioneine suppresses hepatic stellate cell activation via promoting Foxa3-dependent potentiation of the Hint1/Smad7 cascade and improves CCl4-induced liver fibrosis in mice
Source: Royal Society of Chemistry journal article supplement (doi:10.1039/d3fo03643j), 2023-01-01

Figure 1

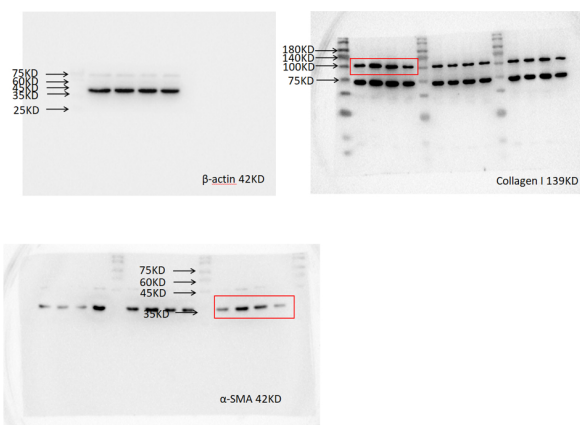

Figure 2

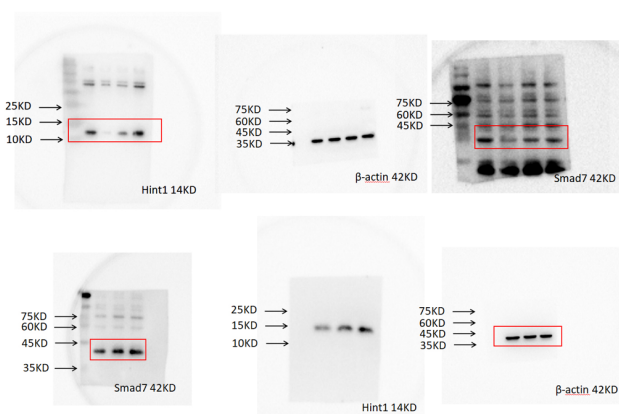

Figure 3

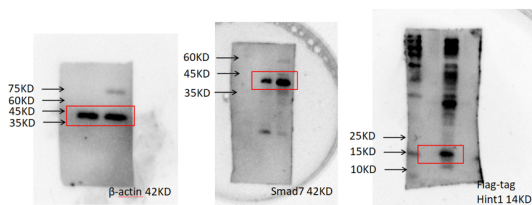

Figure 4

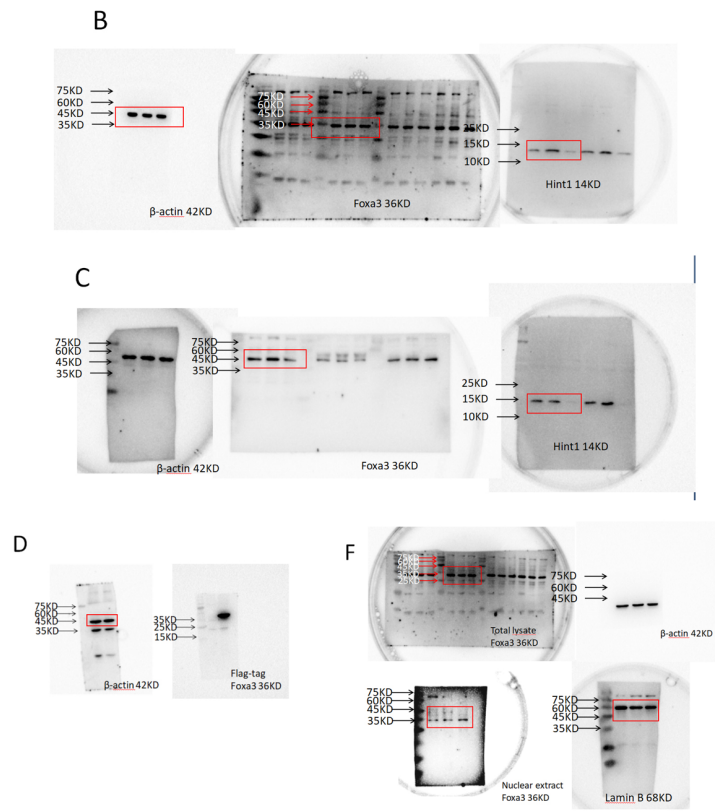

Figure 5

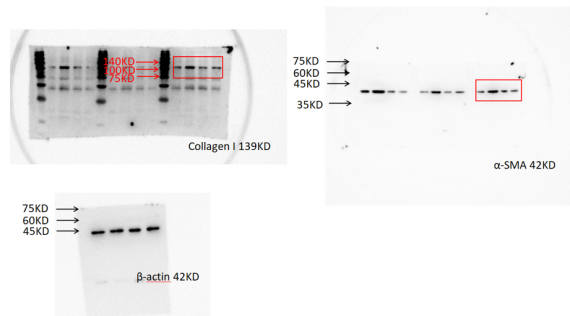

Supplement: d3fo03643j1.pdf [file d3fo03643j1.pdf]
